# Supplementary material
Source: PubMed Central journal article supplement (PMC4692116)
Supplement: Supp_Figure1.pdf [file Supp_Figure1.pdf]

## Supplementary Data

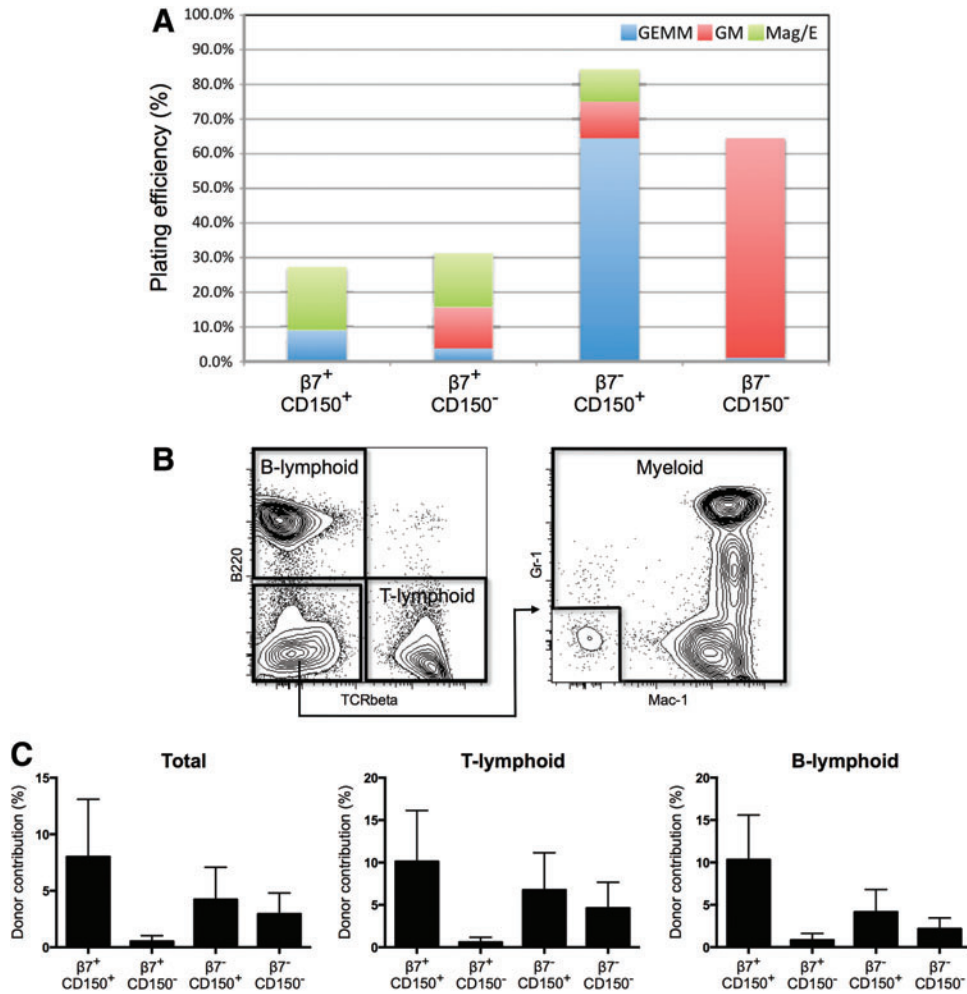

**SUPPLEMENTARY FIG. S1.** Differentiation potential of  $\beta 7^+$  hematopoietic stem cells (HSCs). (A) Single-cell colony-forming efficiency of the indicated hematopoietic stem and progenitor cells. (B) Gating strategy used for lineage analysis. (C) Frequency of donor-derived cells in the peripheral blood of recipient mice at 16 weeks after transplantation with 100 test cells plus  $2 \times 10^5$  competitor whole bone marrow (WBM) cells. Data are mean  $\pm$  SEM ( $n = 13$  per group, from three independent experiments).
