# Supplementary material
Source: PubMed Central journal article supplement (PMC4692116)
Supplement: Supp_Figure2.pdf [file Supp_Figure2.pdf]

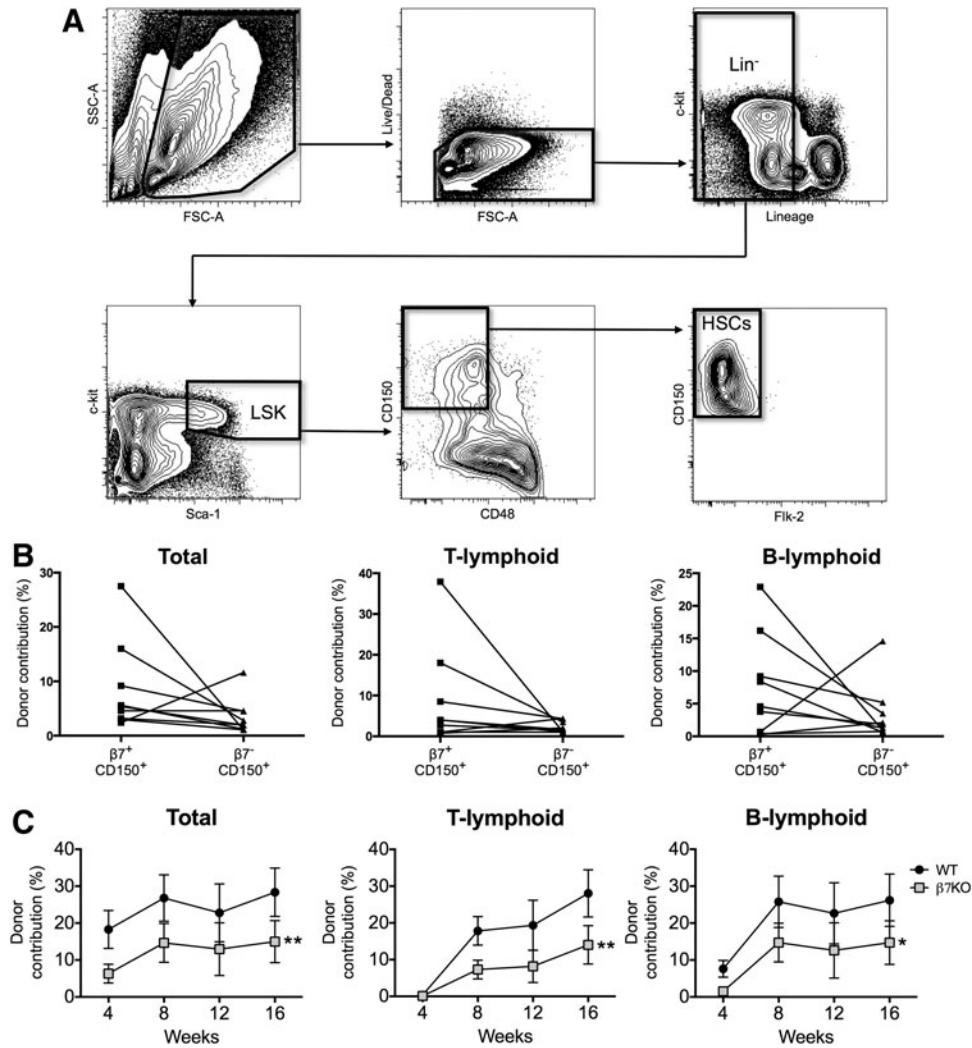

**SUPPLEMENTARY FIG. S2.** Effect of  $\beta 7$  integrin expression on HSC engraftment. **(A)** Gating strategy used for sorting purified HSCs (LSK CD150<sup>+</sup>CD48<sup>+</sup>Flk-2<sup>+</sup>). **(B)** Frequency of donor-derived cells in the peripheral blood of recipient mice at 16 weeks after transplantation for the competitive reconstitution assay with CD150<sup>+</sup> $\beta 7^{+}$  and CD150<sup>+</sup> $\beta 7^{-}$  LSK BM cells ( $n = 9$  per group,  $*P < 0.05$ ). **(C)** Frequency of donor-derived cells in the peripheral blood of recipient mice 4–16 weeks after transplantation for the competitive reconstitution assay using WT and  $\beta 7$ KO HSCs. Data are mean  $\pm$  SEM ( $n = 11$ – $17$  per group, from four independent experiments,  $*P < 0.05$ ;  $**P < 0.01$ ).
