# Supplementary material
Source: PubMed Central journal article supplement (PMC4692116)
Supplement: Supp_Figure3.pdf [file Supp_Figure3.pdf]

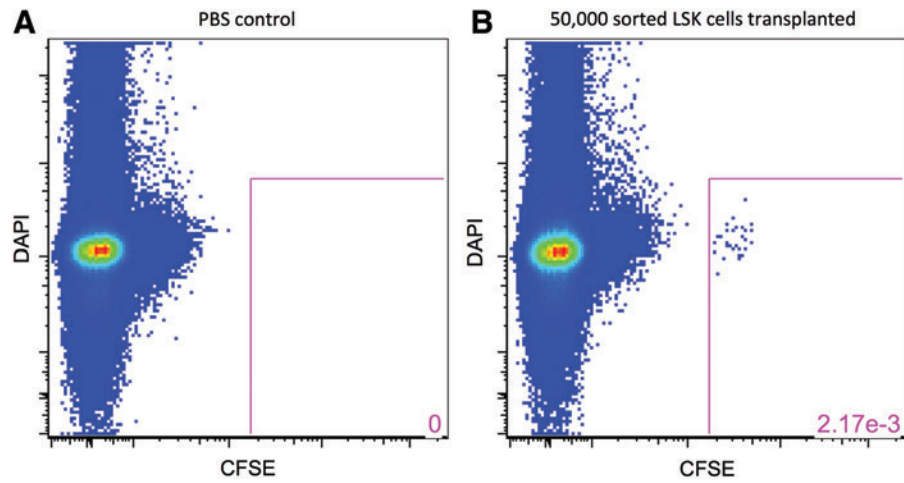

**SUPPLEMENTARY FIG. S3.** Validation of carboxyfluorescein succinimidyl ester (CFSE) labeling for in vivo homing assay. Representative profile of flow cytometry analysis of CFSE labeling of BM homed cells in PBS-injected recipient (**A**) and 50,000 LSK-transplanted recipient (**B**) at 16 h after transplantation.
