# Supplementary material
Source: PubMed Central journal article supplement (PMC4692116)
Supplement: Supp_Figure4.pdf [file Supp_Figure4.pdf]

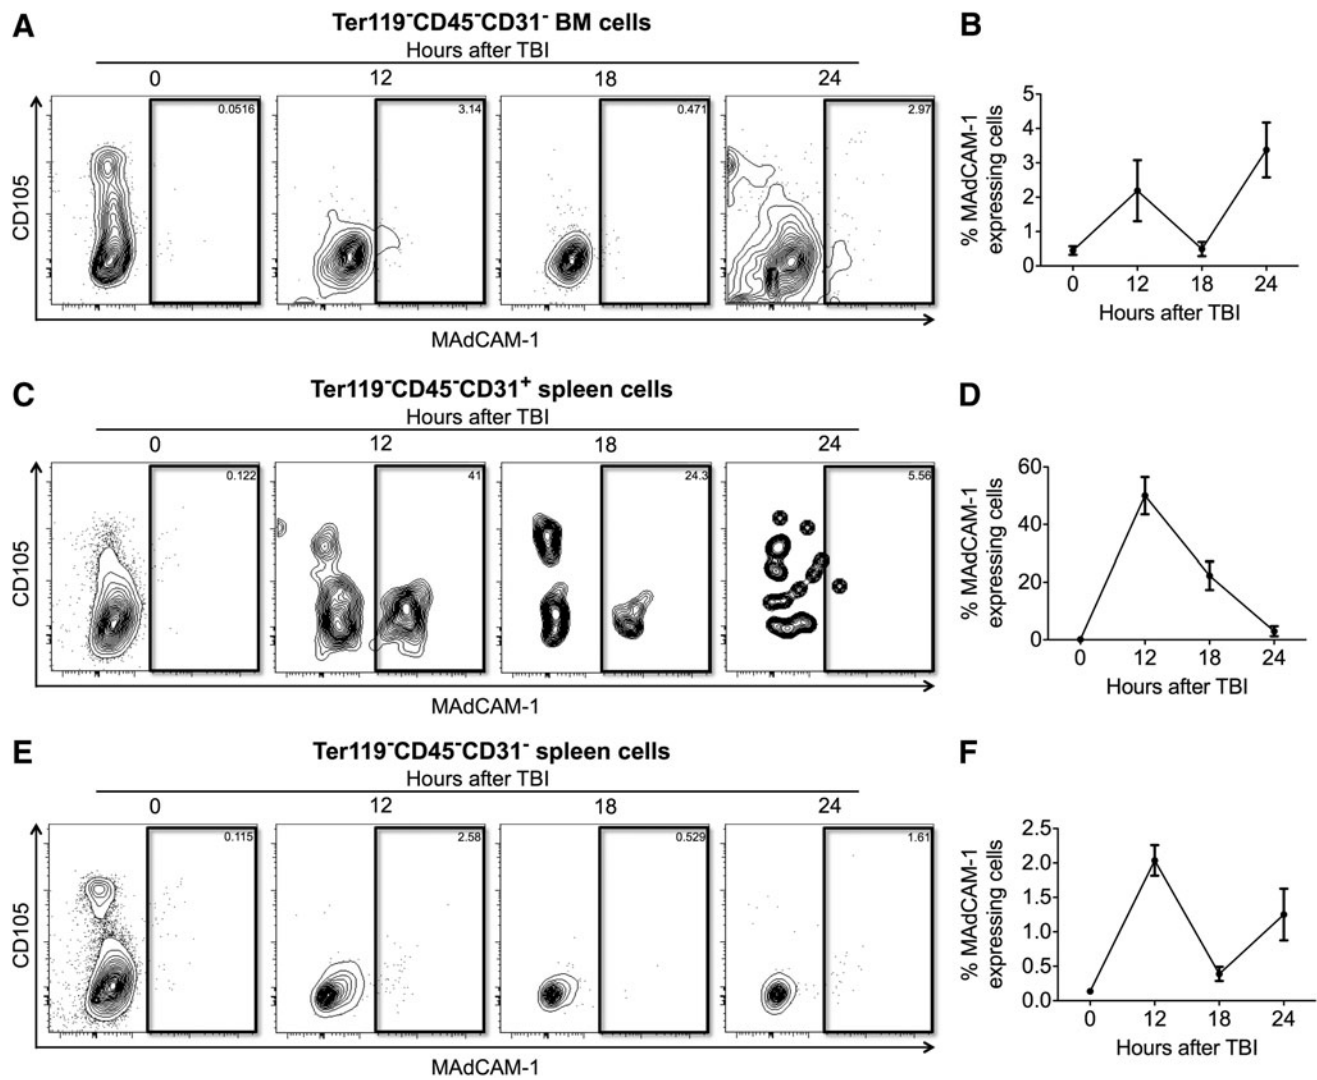

**SUPPLEMENTARY FIG. S4.** Effects of lethal irradiation on MAdCAM-1 expression within the BM and spleen microenvironments. Representative profile of flow cytometry analysis of MAdCAM-1 expression on (A) BM stroma (Ter119<sup>-</sup>CD45<sup>-</sup>CD31<sup>-</sup> cells), (C) spleen ECs (Ter119<sup>-</sup>CD45<sup>-</sup>CD31<sup>+</sup> cells), and (E) spleen stroma (Ter119<sup>-</sup>CD45<sup>-</sup>CD31<sup>-</sup> cells), at the indicated times after total body irradiation (TBI). Frequency of MAdCAM-1-expressing cells among (B) BM stroma (Ter119<sup>-</sup>CD45<sup>-</sup>CD31<sup>-</sup> cells), (D) spleen ECs (Ter119<sup>-</sup>CD45<sup>-</sup>CD31<sup>+</sup> cells), and (F) spleen stroma (Ter119<sup>-</sup>CD45<sup>-</sup>CD31<sup>-</sup> cells), at the indicated times after TBI ( $n=4$  per group).
